# Supplementary material for: Genome-Wide Identification and Characterization of Pectin Methylesterase Inhibitor Genes in Brassica oleracea
Source: Int J Mol Sci. 2018 Oct 26;19(11):3338. doi: 10.3390/ijms19113338 (PMC6274938; doi:10.3390/ijms19113338)
Supplement: Supplementary file 1 [file ijms-19-03338-s001.xlsx]

## Sheet: Table S1
Table S1. Identification and physicochemical property predictions of PMEI genes in Brassica oleracea.
Gene	Locus name	Chromosome	Subgenome	Genome location Star	Genome location End	Strand	Exon number	CDS length (bp)	Protein length (aa)	Molecular weight (kDa)	Isoelectric point	Signal peptide position	Transmembrane helix number	Subcelular localizacion			Solubility (%)
														Plant-mPLoc	WolF PSORT	ProtComp 9.0
BoPMEI1	Bol039450	C01	LF	11066243	11067169	+	2	552	183	19.7564	5.16	1-26	0	pl	ex, v, cy	ex	0
BoPMEI2	Bol039512	C01	LF	11466479	11467078	+	1	600	199	21.7009	8.69	1-25	0	pl	ch, ex, cy, v	ex	97.2
BoPMEI3	Bol039513	C01	LF	11476809	11477396	+	1	588	195	21.391	8.92	1-25	0	pl	ch, ex, n, m	ex	59.3
BoPMEI4	Bol039514	C01	LF	11480661	11481266	-	1	606	201	22.148	5	1-24	1	pl	v, ex, ch, n	ex	73.7
BoPMEI5	Bol018736	C01	MF1	15966623	15966940	-	1	318	105	11.7776	5.38	N/A	0	pl, n	ex, ch, n, cy, g	ex	0
BoPMEI6	Bol007352	C01	MF1	35748490	35748888	-	1	399	132	14.82	9.23	1-19	0	n	ex, ch, cy, m, v, er	ex	0
BoPMEI7	Bol008115	C01	MF1	38683459	38684484	-	1	1026	341	35.0849	3.93	1-24	0	n	ex, ch, cy, m, g	ex	100
BoPMEI8	Bol036112	C02	MF1	5702815	5703057	-	1	243	80	9.01124	8.98	N/A	0	pl	ch, n, m, cy, pl	ex	0
BoPMEI9	Bol028617	C02	MF1	13057417	13058439	-	2	459	152	16.9925	6.11	N/A	0	pl, n	pe, cy	ex	100
BoPMEI10	Bol028592	C02	MF1	13313758	13314862	+	2	561	186	20.2062	5.45	1-28	1	pl	ex, ch, cy, m	ex	0
BoPMEI11	Bol016560	C02	MF1	24711926	24712480	-	1	555	184	19.8377	4.72	1-21	1	pl	ex, ch, v, cy, n, er	ex	100
BoPMEI12	Bol020131	C02	MF1	32438486	32438998	-	1	513	170	18.3695	9.51	N/A	0	pl	ch, ex, n, m	ex	0
BoPMEI13	Bol020136	C02	MF1	32504583	32505110	-	1	528	175	19.1833	8.53	1-20	0	pl	ex, ch, v	ex	5.4
BoPMEI14	Bol020137	C02	MF1	32508484	32509011	+	1	528	175	19.1018	5.46	1-20	0	pl	ex, n, v	ex	99.9
BoPMEI15	Bol020139	C02	MF1	32530387	32530845	-	1	459	152	17.5633	8.47	N/A	0	pl	ex, cy, ch, n, m, g	ex	0
BoPMEI16	Bol014799	C02	MF1	34520022	34520645	-	1	624	207	22.3885	8.65	1-25	0	pl	ch, ex	ex	0
BoPMEI17	Bol034345	C03	MF1	2773553	2774174	+	2	519	172	18.9896	5.8	1-21	0	pl	ch	ex	0
BoPMEI18	Bol025768	C03	MF1	4415778	4416389	-	1	612	203	21.8449	8.34	1-22	0	pl	ex, cy, er, m	ex	0
BoPMEI19	Bol027944	C03	MF1	6630417	6631140	-	2	534	177	19.4727	8.5	1-24	0	pl	ex, ch, v	ex	100
BoPMEI20	Bol029607	C03	MF1	13815719	13816369	-	1	651	216	23.7825	8.38	1-20	1	pl	v, ch, ex, g, n	ex	8.9
BoPMEI21	Bol015020	C03	MF1	14401583	14402206	+	1	624	207	23.7735	10.08	1-25	1	pl	ch, v, pl, ex, n, m, er	ex	0
BoPMEI22	Bol015069	C03	No hits	14919004	14919790	+	2	525	174	19.0844	9.04	1-24	1	pl	ex, ch, v	ex	0
BoPMEI23	Bol030672	C03	MF1	18787003	18787551	-	1	549	182	19.4683	4.59	1-22	1	pl	ex, ch, v, cy, n, er	ex	100
BoPMEI24	Bol022953	C03	MF1	22452427	22452978	-	1	552	183	20.045	5.7	1-27	0	pl	ch, ex	ex	0
BoPMEI25	Bol022951	C03	MF1	22478422	22478985	+	1	564	187	20.3857	4.87	1-28	0	pl	v, ch, ex, n	ex	0
BoPMEI26	Bol015882	C03	LF	30634741	30635280	-	1	540	179	19.5566	9.1	1-24	0	pl	ch, v, ex, n, m	ex	0
BoPMEI27	Bol015881	C03	LF	30642992	30643483	-	1	492	163	17.7076	9.28	1-26	1	pl	ex, ch, v, n, m	ex	0
BoPMEI28	Bol024866	C03	LF	39247442	39247999	+	1	558	185	20.2271	10.19	N/A	0	pl	ch	ex	0
BoPMEI29	Bol024904	C03	LF	39693352	39694041	-	1	690	229	24.7986	5.34	N/A	1	pl	ch, cy, pl, er, n	ex	8.8
BoPMEI30	Bol014357	C03	MF1	52457886	52458407	+	1	522	173	19.5189	11.24	1-29	1	pl	ch, ex	ex	0
BoPMEI31	Bol014400	C04	MF1	14547245	14549721	-	5	1182	393	43.0424	7.96	N/A	0	pl, cy, n	cy, ch, n, m, pl	ex	86.9
BoPMEI32	Bol021815	C04	MF1	40861406	40862056	-	1	651	216	23.7056	8.97	1-20	1	pl	ex, cy, v, ch	ex	0
BoPMEI33	Bol038089	C05	LF	5608980	5609528	+	1	549	182	20.0598	7.64	1-25	0	pl	ch	ex	0.3
BoPMEI34	Bol036695	C05	LF	25433171	25433677	+	1	507	168	18.4444	9.54	N/A	1	pl	ex, v, g	ex	0
BoPMEI35	Bol036837	C05	LF	26253516	26254022	-	1	507	168	18.3662	5.16	1-20	0	pl, n	ex, v, cy, m, ch	ex	0
BoPMEI36	Bol036838	C05	LF	26256262	26256594	-	1	333	110	12.2964	9.07	1-22	0	n	ex, ch, v, cy, pl	ex	0
BoPMEI37	Bol036840	C05	LF	26262235	26262735	-	1	501	166	18.4293	4.95	1-19	0	pl	ex, v, ch, cy	ex	0
BoPMEI38	Bol036841	C05	LF	26267097	26267726	-	1	630	209	23.9239	6.45	1-22	0	pl	m, ch, ex, n, er	ex	100
BoPMEI39	Bol036874	C05	LF	26607884	26608456	+	1	573	190	21.2012	9.04	1-30	0	pl	ch, ex, cy	ex	0
BoPMEI40	Bol036876	C05	LF	26678527	26679087	+	1	561	186	20.2615	8.73	1-27	0	pl	ch, cy, ex	ex	0
BoPMEI41	Bol036882	C05	LF	26748244	26748795	+	1	552	183	19.8159	7.61	1-27	0	pl, n	ch, ex	ex	0
BoPMEI42	Bol010261	C05	LF	29958796	29959248	-	1	453	150	16.2308	8.24	1-26	1	pl	ex, cy, m, pl, n	ex	0
BoPMEI43	Bol009301	C05	MF1	30903648	30904199	-	1	552	183	19.6906	5.37	1-27	0	pl	ex, ch, cy, m	ex	0
BoPMEI44	Bol009300	C05	MF1	30905089	30905738	-	2	486	161	17.3867	8.25	1-18	0	pl	ex, v, ch, cy	ex	100
BoPMEI45	Bol009299	C05	MF1	30914536	30915246	+	2	519	172	18.9237	8.65	1-21	0	pl	ch, ex, n, v, pl, g	ex	0
BoPMEI46	Bol009298	C05	MF1	30919628	30928681	+	2	390	129	14.0679	5.75	N/A	0	pl	ch, m, n, cy	ex	0
BoPMEI47	Bol009292	C05	MF1	31032768	31033220	-	1	453	150	16.371	9.6	1-27	1	pl	ex, ch, v	ex	0
BoPMEI48	Bol009290	C05	No hits	31038673	31039140	-	1	468	155	16.1344	8.57	N/A	0	pl	ch, m, n	ex	0.5
BoPMEI49	Bol005226	C06	No hits	13731718	13732326	+	1	609	202	22.1231	5.24	1-19	0	pl	ex, v, ch, m	ex	100
BoPMEI50	Bol010846	C06	MF1	16513912	16514559	-	1	648	215	23.4488	7.63	1-20	0	pl	ch, m, v, n, cy, pl, ex	ex	100
BoPMEI51	Bol019449	C06	No hits	18176194	18176802	-	1	609	202	21.9222	4.2	1-21	0	pl	ch, ex, cy	ex	0
BoPMEI52	Bol013323	C06	MF1	18939884	18940414	-	1	531	176	19.1586	4.52	1-23	1	pl	ex, ch, v	ex	100
BoPMEI53	Bol038986	C06	LF	19794892	19795591	+	2	555	184	20.5933	8.47	1-26	0	pl, n	ex, n, er, cy, pl, v	ex	0.1
BoPMEI54	Bol017420	C06	MF1	34723485	34724117	-	1	633	210	23.3085	5.1	1-24	0	pl	cy, m, ex, er, g, n, v	ex	0
BoPMEI55	Bol045162	C06	LF	39672709	39673436	-	2	483	160	17.4166	7.59	1-17	0	pl	ex, cy, v, ch, m, er	ex	0
BoPMEI56	Bol012426	C07	No hits	2775817	2776308	-	1	492	163	17.8373	4.94	N/A	0	pl, n	ch, ex, cy, m	ex	100
BoPMEI57	Bol043197	C07	MF1	19657363	19657896	+	1	534	177	19.327	5.05	1-25	1	pl	ex, ch, cy, m	ex	69.5
BoPMEI58	Bol012289	C07	MF1	23388269	23388766	+	1	498	165	17.8327	8.54	1-25	0	pl	ch, m, v,	ex	11.9
BoPMEI59	Bol012296	C07	MF1	23428811	23429485	+	1	675	224	24.7249	5.11	N/A	1	pl	cy, er, ex, ch, n, m, v	ex	100
BoPMEI60	Bol008517	C07	LF	28869019	28869567	-	1	549	182	20.6313	9.6	1-22	1	pl	ex, ch, v, m	ex	0
BoPMEI61	Bol008525	C07	LF	28905458	28906018	-	1	561	186	21.0258	8.69	1-19	0	pl	ex, v, ch, cy, m, pl, er	ex	0
BoPMEI62	Bol008526	C07	LF	28919453	28920034	-	1	582	193	21.8417	9.4	1-17	0	pl	ex, ch, m, pl, v, er	ex	100
BoPMEI63	Bol004671	C07	LF	29825089	29825727	-	1	639	212	23.0434	7.54	1-25	1	pl	ch, m	ex	0
BoPMEI64	Bol042219	C07	MF1	43760302	43760901	+	1	600	199	22.0903	7.54	1-25	0	pl	ch, m, ex, v	ex	100
BoPMEI65	Bol042220	C07	MF1	43763258	43763863	-	1	606	201	21.9951	5.18	1-24	0	pl	ex, ch, v, er, n	ex	99.7
BoPMEI66	Bol010176	C08	MF1	15345460	15345816	+	1	357	118	12.7825	5.55	N/A	1	pl, n	cy, ch, n, ex	ex	100
BoPMEI67	Bol029229	C08	MF1	19489409	19490014	+	1	606	201	21.8977	6.58	1-25	0	pl	ch, n, m, ex,	ex	0
BoPMEI68	Bol037368	C08	LF	24514738	24515304	+	1	567	188	21.5435	9.92	1-19	0	pl	ex, m, v, er,	ex	0
BoPMEI69	Bol044589	C08	LF	33161854	33162504	-	1	651	216	23.9979	9.12	1-20	0	pl	ch, ex,	ex	0
BoPMEI70	Bol045705	C08	LF	33377555	33378124	+	1	570	189	20.8702	9.87	1-21	0	pl	ch,	ex	100
BoPMEI71	Bol031283	C08	MF1	39192964	39193470	+	1	507	168	18.3513	9.75	N/A	1	pl	ch, ex, v, n, m,	ex	0
BoPMEI72	Bol006588	C08	MF1	39756272	39756796	-	2	459	152	16.7473	5.14	1-20	0	n	ex, ch, v, cy	ex	100
BoPMEI73	Bol006039	C09	LF	1003484	1004038	+	1	555	184	19.8117	4.78	1-21	1	pl	ex, ch, v, cy, er	ex	100
BoPMEI74	Bol018944	C09	MF1	8739120	8739626	+	1	507	168	18.736	9.32	1-16	0	pl	ex, cy, ch, n, m	ex	0
BoPMEI75	Bol018943	C09	MF1	8742061	8742603	+	1	543	180	20.6703	8.75	1-20	1	pl	ch, ex, v, n	ex	100
BoPMEI76	Bol018864	C09	MF1	9716673	9717287	-	1	615	204	22.2809	5.04	1-25	0	pl	ch, m, ex	ex	0
BoPMEI77	Bol012101	C09	LF	12864998	12865612	-	1	615	204	22.9038	10.25	1-25	0	pl	ch, m	ex	0
BoPMEI78	Bol029382	C09	LF	17897949	17898563	+	1	615	204	22.6381	9.07	1-24	0	pl	ex, ch, n, cy	ex	0
BoPMEI79	Bol035794	C09	LF	29926958	29927548	+	1	591	196	21.1173	9.23	1-23	1	pl	ex, cy, m, er, ch	ex	0
BoPMEI80	Bol024799	Scaffold000091	LF	1045858	1046472	-	1	615	204	22.2925	9.58	1-23	1	pl	ch, ex,	ex	0
BoPMEI81	Bol023486	Scaffold000099_P1	LF	224868	225362	+	1	495	164	17.5334	8.24	1-23	0	pl, n	ex, m,er,	ex	18.3
BoPMEI82	Bol023500	Scaffold000099_P1	LF	381949	382596	+	1	648	215	23.749	5.15	1-28	1	pl	ch, ex, cy, v	ex	11.5
BoPMEI83	Bol020681	Scaffold000121_P2	MF1	142979	143557	+	1	579	192	21.4086	9.7	1-24	1	pl	ch, n, m	ex	0
BoPMEI84	Bol020682	Scaffold000121_P2	MF1	147412	148017	+	1	606	201	22.3026	9.42	1-24	0	pl	ch, ex	ex	0
BoPMEI85	Bol019086	Scaffold000133	MF1	404903	405433	-	1	531	176	19.046	7.54	1-22	0	pl	ex, m, v	ex	0.4
BoPMEI86	Bol019203	Scaffold000133	MF1	1262870	1263469	-	1	600	199	21.5687	6.22	1-31	0	pl	ch, v, m	ex	100
BoPMEI87	Bol010982	Scaffold000215	MF1	120382	120996	+	1	615	204	22.4646	5.57	1-30	1	pl	ch	ex	91.6
BoPMEI88	Bol003939	Scaffold000335	MF1	131995	132486	+	1	492	163	18.3424	10.89	N/A	0	pl	ch	ex	0
BoPMEI89	Bol002571	Scaffold000383	MF1	87847	88458	+	1	612	203	22.7651	9.3	1-18	0	pl	ch, ex	ex	0
BoPMEI90	Bol001577	Scaffold000434	MF1	159877	160398	+	1	522	173	18.7822	4.49	1-20	0	pl	ch, m, n, cy, ex	ex	100
BoPMEI91	Bol001158	Scaffold000464	LF	96594	97244	-	1	651	216	23.6737	9.22	1-20	1	pl	ex, v, cy, ch, m	ex	0
BoPMEI92	Bol001127	Scaffold000467	LF	78984	79604	+	1	621	206	23.2229	9.46	1-25	0	pl	ch, ex	ex	0
BoPMEI93	Bol001000	Scaffold000480	MF1	74458	74955	-	1	498	165	17.7865	8.21	1-26	1	pl	ch, ex	ex	100
BoPMEI94	Bol000750	Scaffold000503	LF	42330	42962	+	1	633	210	24.1249	9.98	1-22	1	pl	er, ex, m, pl, n, cy	ex	0
BoPMEI95	Bol000654	Scaffold000511	MF1	64767	65267	-	1	501	166	17.8448	9.6	1-23	0	pl, n	ch, ex, m	ex	0
Note: ch: chloroplast; cy: cytosol; er: endoplasmic reticulum; ex: extracellular; g: Golgi apparatus; m: mitochondria; n: nuclear; pl: plasma membrane; v: vacuolar membrane; pe: roxisome.

## Sheet: Table S2
Table S2. Basic information of PMEI genes in Arabidopsis thaliana.
Locus name	Position (5'-3')	CDS length (bp)	Strand	Exon number	Molecular weight (kDa)	Isoelectric point	Signal peptide position	Transmembrane helix number	Subcelular localizacion
									Plant-mPLoc	WolF PSORT	ProtComp 9.0
At1G02550	536483-537211	729	+	1	26.2228	4.6	1-24	0	cm	ch, m	ex
At1G09360	3021802-3022368	567	+	1	21.3529	6.39	1-18	0	cm	cy, ex, g	ex
At1G09370	3024896-3025435	525	+	1	19.5406	8.15	1-20	0	cm	ex, ch, cy, m	ex
At1G10770	3591633-3592411	504	-	1	18.0999	9.68	N/A	1	cm	ch, ex, v, n, m	ex
At1G11362	3824510-3825196	555	-	1	20.6007	5.88	1-26	1	cm	v, ex, ch, n, cy, m	ex
At1G11593	3898002-3898609	570	+	1	21.608	6.16	1-26	0	cm	ex, ch, cy	ex
At1G14890	5137014-5137957	660	+	1	24.3216	8.24	N/A	1	cm	cy, er, ch, n, v, g	ex
At1G23205	8233997-8234893	618	-	1	22.6766	5.25	1-26	0	cm	ch, ex, cy	ex
At1G23350	8293595-8294264	480	-	1	17.2638	7.7	1-20	0	cm	ex, ch, n, cy, m	ex
At1G47960	17681157-17683629	618	-	4	22.3261	8.15	1-23	1	cm	ex, v, cy, m, g	ex
At1G48010	17711491-17712660	537	-	2	19.9817	5.45	N/A	0	cm	cy, ch, n, ex	ex
At1G48020	17716051-17716808	531	-	1	18.9667	7.7	1-25	1	cm	ch, ex, cy	ex
At1G50325	18639874-18640488	594	-	1	22.3337	5.59	1-26	1	cm	v, ex, ch, n, cy, m, er	ex
At1G50340	18647376-18647849	474	-	1	17.7425	7	N/A	0	cm	n, ch, ex, cy,	ex
At1G54620	20400437-20401025	579	-	1	22.3169	9.54	1-29	1	cm	ch, er, n, cy, v, pl, ex	ex
At1G54980	20507375-20508355	543	-	3	19.7273	7.7	1-25	0	cm, n	ex, v, ch, n, m	ex
At1G55770	20851039-20851566	528	-	1	18.5848	4.43	1-20	1	cm	ex, ch, n,	ex
At1G56100	20983280-20984058	513	-	2	18.8159	5.57	1-20	0	cm, n	ex, cy, v, n, m, pl, g	ex
At1G56620	21219818-21220357	540	+	1	20.0964	8.17	1-25	0	cm, n	ch, ex	ex
At1G60760	22365832-22366323	492	+	1	17.941	10.07	1-29	1	cm	ch,	ex
At1G62760	23237574-23238512	939	-	1	32.3542	5.88	1-25	0	n	ch, m, n	ex
At1G62770	23245886-23246890	615	-	2	22.6842	9.36	1-23	0	cm	v, ch, ex, n, m	ex
At1G70540	26593930-26594670	504	+	1	17.7073	9.16	1-26	0	cm	ch, ex	ex
At1G70720	26666408-26667204	603	+	1	22.4085	5.38	1-23	0	cm	ex, v, ch, n, cy	ex
At2G01610	273917-274820	669	-	1	23.9538	6.02	1-27	1	cm	ch, ex	ex
At2G10970	4332839-4333579	585	-	1	21.3535	6.27	1-29	0	cm	ch, m, ex	ex
At2G15345	6684411-6685069	121	-	1	14.02	8.75	N/A	0	n	pe, n, cy	ex
At2G31425	13394721-13395720	558	+	2	21.2675	7.07	1-28	1	cm	pe, er, pl, ch, v, g	ex
At2G31430	13396192-13397162	540	+	2	20.3318	9.18	1-25	1	cm	ex, ch, n, cy, v,	ex
At2G31432	13397597-13398839	489	+	2	18.7856	8.03	N/A	0	cm	ch, ex, cy	ex
At2G47050	19331685-19332646	651	-	1	23.7756	8.99	1-20	1	cm	ex, m, v, er, ch, cy	ex
At2G47340	19432168-19433104	849	+	1	30.0367	4.52	N/A	0	cm, n	ch, ex, v, n,	ex
At2G47670	19543991-19544806	627	-	1	23.1776	9.44	1-30	0	cm	ch,	ex
At3G05741	1701378-1702180	573	-	1	21.3025	8.22	1-30	1	cm	ex, ch,	ex
At3G12880	4095535-4096236	540	+	1	19.5416	8.27	1-20	1	cm	ch, n, m, v, pl, ex, er	ex
At3G17130	5844495-5845046	552	-	1	19.4535	5.97	1-27	0	cm	ch,	ex
At3G17140	5846002-5846589	339	-	2	11.9871	7.84	N/A	0	ch	cy, ch, ex	ex
At3G17150	5847258-5848195	555	+	2	20.7489	8.85	1-26	0	cm	ch, v, ex, n, pl, g	ex
At3G17152	5848787-5849614	528	+	2	19.4825	8.83	1-22	0	cm	ch, m, ex	ex
At3G17220	5883328-5883849	522	-	1	18.3671	8.92	1-25	0	cm	ch,	ex
At3G17225	5884374-5884931	558	-	1	37.1079	7.05	1-28	0	cm	ch, ex	ex
At3G17230	5886381-5889236	1056	-	2	38.5004	6.72	1-28	0	cm	v, ch, ex, n, g	ex
At3G27999	10402872-10403511	570	+	1	21.7641	5.36	1-26	0	cm	ex, v, ch, n, pl, g	ex
At3G36659	2100189-2100983	795	+	1	27.5371	4.49	N/A	0	cm	ex, ch, m, v	ex
At3G47380	17457795-17458570	609	+	1	22.2256	10.11	1-21	1	cm	ch,	ex
At3G47670	17574785-17575880	831	-	1	30.3906	6.68	N/A	1	cm	ex, cy, m, er, g, pl, v	ex
At3G49330	18291488-18292048	561	+	1	13.8703	9.54	N/A	0	cm	cy, m, ch, ex, pl, ex,	ex
At3G55680	20665685-20666315	552	-	2	20.8582	7.28	1-28	1	cm, n	ex, v, ch, m	ex
At3G62180	23019623-23020479	648	-	1	23.73	7.7	1-20	0	cm	ex, cy, m, pl, v	ex
At3G62820	23229749-23230501	585	+	1	21.4587	9.89	1-25	0	cm	ex, v, ch, er, n, m, pl	ex
At4G00080	32893-33718	630	+	1	23.9745	10.03	1-24	1	cm	ex, ch, er	ex
At4G00872	364147-364736	495	-	2	18.3166	8.17	1-21	0	cm	ch,v, m, ex	ex
At4G02250	983970-984523	483	+	2	17.2017	4.88	1-21	0	cm	ch, ex	ex
At4G03945	1877872-1878545	579	+	1	21.9873	7	1-26	0	cm	ex, ch, v, n, pl, g	ex
At4G12390	7336497-7337356	621	+	1	23.0778	9.71	1-25	0	cm	ch,	ex
At4G15750	8967554-8968604	516	-	2	19.2664	5.04	1-20	0	cm, n	ch, ex, er	ex
At4G24640	12717788-12719017	564	+	2	19.9357	5.88	1-26	0	cm	ex, m, er	ex
At4G25250	12934562-12935373	600	+	1	21.8971	8.85	1-25	0	cm	v, ex, ch, cy, m	ex
At4G25260	12935710-12936658	606	-	1	22.173	5.1	1-24	1	cm	ch, ex, v, er, cy, m, pl	ex
At5G20740	7025686-7026532	618	-	1	22.3293	7.52	1-25	1	cm	ch, n,	ex
At5G24370	8320969-8321544	576	+	1	21.1643	8.17	1-27	0	cm	ex, v, er, cy,	ex
At5G38610	15460691-15461459	600	-	1	21.6375	4.55	1-21	0	cm	ex, ch, n, cy, m	ex
At5G46930	19056655-19058814	537	-	1	20.16	8.8	1-20	2	cm	ex, g, ch, m, pl, v, er	ex
At5G46940	19058168-19058814	531	-	1	19.1635	9.74	1-20	0	cm	ch, ex	ex
At5G46950	19059519-19060121	525	-	1	19.09	5.2	1-20	0	cm	ex, v, n, m	ex
At5G46960	19062174-19062780	525	-	1	19.0698	5.15	1-20	0	cm	ex, v, ch, m	ex
At5G46970	19063918-19064412	495	-	1	18.5887	9.11	1-20	1	cm	ex, ch, v, m	ex
At5G46980	19065453-19066007	555	-	1	21.4398	8.56	1-19	0	cm	ch, ex, cy, v, er, m, pl	ex
At5G46990	19067692-19068255	564	-	1	21.63	9.11	1-19	1	cm	ch, ex, v, cy,	ex
At5G50030	20354589-20355627	564	+	2	20.0557	5	1-26	1	cm	ex, ch, cy, m, er,	ex
At5G50040	20357126-20358107	528	+	2	18.2679	6.62	1-26	1	cm	ex, ch, cy, n, m, v,	ex
At5G50050	20360024-20361031	528	+	2	18.65	5.09	1-26	2	cm	v, pl, ex, g	ex
At5G50060	20362550-20363461	501	+	2	18.2259	5.5	N/A	0	cm	ch, cy, n, pl, ex	ex
At5G50070	20364556-20365429	552	+	2	19.59	8.34	1-26	2	cm	ch,	ex
At5G51520	20925980-20926594	615	+	1	22.4637	8.95	1-25	0	cm	ch, ex	ex
At5G62340	25033518-25034404	621	+	1	22.7639	8.24	1-23	1	cm	ch,	ex
At5G62350	25037426-25038362	609	+	1	22.18	9.06	1-17	0	cm	ex, ch, n, m	ex
At5G62360	25040649-25041462	612	+	1	22.3357	7.23	1-29	0	cm	ch, v, ex, n, m, er	ex
At5G64620	25831834-25832502	543	+	1	19.6336	8.55	1-16	0	cm	ex, v, m	ex
Note: ch: chloroplast; cy: cytosol; er: endoplasmic reticulum; ex: extracellular; g: Golgi apparatus; m: mitochondria; n: nuclear; pl: plasma membrane; v: vacuolar membrane; pe: roxisome.
